# Supplementary material
Source: PubMed Central journal article supplement (PMC2907223)
Supplement: 00471.2009_1.pdf [file 00471.2009_1.pdf]

# SUPPLEMENTAL MATERIAL

Mullany, et al.

**Supplementary Table 1.** Sequences of primers used for quantitative RT-PCR

| Gene                   |         | Oligonucleotide sequence   | Reference                                |
|------------------------|---------|----------------------------|------------------------------------------|
| <b>Human</b>           |         |                            |                                          |
| HSD3B1                 | Forward | CCATGTGGTTTGCTGTTACCAA     | Montgomery, RB<br><i>et al.</i> , 2008   |
|                        | Reverse | TCAAAACGACCCCTCAAGTTAAAAGA |                                          |
| CYP1A2                 | Forward | AACAAGGGACACAACGCTGAAT     | Rodriguez-Antona<br><i>et al.</i> , 2001 |
|                        | Reverse | GGAAGAGAAACAAGGGCTGAGT     |                                          |
| PSA                    | Forward | GCATGGGATGGGGATGAAGTAAG    | Montgomery, RB<br><i>et al.</i> , 2008   |
|                        | Reverse | CATCAAATCTGAGGGTTGTCTGGA   |                                          |
| SRD5A1                 | Forward | CCTGTTGAATGCTTCATGACTTG    | Montgomery, RB<br><i>et al.</i> , 2008   |
|                        | Reverse | TAAGGCAAAGCAATGCCAGATG     |                                          |
| CAR3<br>(NM_005181)    | Forward | CGTGAGCTCTGACCAGA          |                                          |
|                        | Reverse | GTAAGAGCACCAGAAGGA         |                                          |
| HSD17B2                | Forward | CCAGGGAAAGGCGCTTACTTGT     | Montgomery, RB<br><i>et al.</i> , 2008   |
|                        | Reverse | GGGCTTGTCTTGCCAAAATGT      |                                          |
| <b>Mouse</b>           |         |                            |                                          |
| Srd5a1                 | Forward | AGGAAGGCCAAGACAAAGGT       |                                          |
|                        | Reverse | ACTGGGCAACCTGCCTAA         |                                          |
| Hsd3b2                 | Forward | GGAAGATCTGGAGGAGA          |                                          |
|                        | Reverse | TGGTCTGCCTGGGAA            |                                          |
| Hsd3b5                 | Forward | GTATGTGGGCAATGCA           |                                          |
|                        | Reverse | GCAAGCCAGTAAAGCA           |                                          |
| Hsd17b2<br>(NM_008290) | Forward | CAGCACTCCAGCAAACACTG       |                                          |
|                        | Reverse | CTGTGGATCAAAAGGCCG         |                                          |
| Cyp1a2                 | Forward | TGGAGCTGGCTTTGACACAG       | Richardson, TA <i>et al.</i> , 2005      |
|                        | Reverse | CGTTAGGCCATGTCAAAAGTAGC    |                                          |
| Socs3                  | Forward | GCACAAGCACAAAAATCCAGC      | Rigby, RJ <i>et al.</i> , 2007           |
|                        | Reverse | AGAAGCCAATCTGCCCTG         |                                          |
| Mup1                   | Forward | AATGCCAATCGCTGCC           | Stopkova R., Et<br><i>al.</i> , 2007     |
|                        | Reverse | GCTCCGAATTATCTATGGTTGC     |                                          |
| Lcn2<br>(NM_008491)    | Forward | CCCCTGAAGTGAAGGAACGTT      |                                          |
|                        | Reverse | CGTCCTTGAGGCCAGAGA         |                                          |
| Car3<br>(NM_007606)    | Forward | GACGGGAGAAAGGCGAGTTC       |                                          |
|                        | Reverse | CAGGCATGATGGGTCAAAGTG      |                                          |
| ERalpha                | Forward | CTAGCAGATAGGGAGCTGGTTCA    |                                          |
|                        | Reverse | GGAGATTCAAGTCCCCAAAGC      |                                          |

6

7

8

9

10

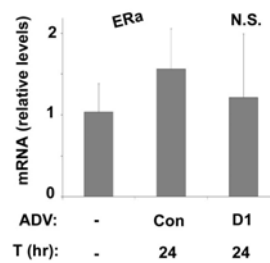

11  
12 **Supplemental Figure 1:** RNA was isolated from livers as in Figure 1 and subjected to  
13 RT-PCR for estrogen-receptor alpha (ER-alpha).  
14
